# Supplementary material
Source: PubMed Central journal article supplement (PMC2952929)
Supplement: NIHMS87928-supplement-supplement_1.pdf [file NIHMS87928-supplement-supplement_1.pdf]

526

**Supplementary Table I**

| <b>Frequency of Detectable Anti-Hu Reactivity According to Covariate Status among Smoking and Non-Smoking Controls</b> |                         |                           |                         |                |                             |                |                            |
|------------------------------------------------------------------------------------------------------------------------|-------------------------|---------------------------|-------------------------|----------------|-----------------------------|----------------|----------------------------|
|                                                                                                                        |                         |                           | <b>Smoking Controls</b> |                | <b>Non-Smoking Controls</b> |                |                            |
| <b>Variable</b>                                                                                                        | <b>Category</b>         | <b>Anti-Hu Reactivity</b> | <b>N</b>                | <b>Percent</b> | <b>N</b>                    | <b>Percent</b> | <b>p-value<sup>1</sup></b> |
| <b>Total Population</b>                                                                                                |                         |                           |                         |                |                             |                |                            |
|                                                                                                                        |                         | <b>Undetectable</b>       | 21                      | 53.9           | 24                          | 61.5           |                            |
|                                                                                                                        |                         | <b>Detectable</b>         | 18                      | 46.2           | 15                          | 38.5           | 0.40                       |
| <b>Race</b>                                                                                                            |                         |                           |                         |                |                             |                |                            |
|                                                                                                                        | <b>Caucasian</b>        | <b>Undetectable</b>       | 14                      | 53.9           | 16                          | 59.3           |                            |
|                                                                                                                        |                         | <b>Detectable</b>         | 12                      | 46.2           | 11                          | 40.7           | 0.69                       |
|                                                                                                                        | <b>African American</b> | <b>Undetectable</b>       | 7                       | 53.9           | 8                           | 66.7           |                            |
|                                                                                                                        |                         | <b>Detectable</b>         | 6                       | 46.2           | 4                           | 33.3           | 0.55                       |
| <b>Gender</b>                                                                                                          |                         |                           |                         |                |                             |                |                            |
|                                                                                                                        | <b>Male</b>             | <b>Undetectable</b>       | 12                      | 60.0           | 12                          | 54.6           |                            |
|                                                                                                                        |                         | <b>Detectable</b>         | 8                       | 40.0           | 10                          | 45.5           | 0.83                       |
|                                                                                                                        | <b>Female</b>           | <b>Undetectable</b>       | 9                       | 47.4           | 12                          | 70.6           |                            |
|                                                                                                                        |                         | <b>Detectable</b>         | 10                      | 52.6           | 5                           | 29.4           | 0.42                       |
| <b>Age (in years)</b>                                                                                                  |                         |                           |                         |                |                             |                |                            |
|                                                                                                                        | <b>&lt; 60</b>          | <b>Undetectable</b>       | 10                      | 71.4           | 10                          | 71.4           |                            |
|                                                                                                                        |                         | <b>Detectable</b>         | 4                       | 28.6           | 4                           | 28.6           | 0.18                       |
|                                                                                                                        | <b>60 - 69</b>          | <b>Undetectable</b>       | 9                       | 42.9           | 13                          | 65.0           |                            |
|                                                                                                                        |                         | <b>Detectable</b>         | 12                      | 57.1           | 7                           | 35.0           | 0.80                       |
|                                                                                                                        | <b>70 +</b>             | <b>Undetectable</b>       | 2                       | 50.0           | 1                           | 20.0           |                            |
|                                                                                                                        |                         | <b>Detectable</b>         | 2                       | 50.0           | 4                           | 80.0           | 0.69                       |

1 McNemar exact p-value for categorical data from matched smoking and non-smoking controls

527

528
